# Supplementary material for: Effects of Vegetarian Diets on Blood Lipids: A Systematic Review and Meta‐Analysis of Randomized Controlled Trials
Source: PubMed Central journal article supplement — J Am Heart Assoc. 2015 Oct 27;4(10):e002408. doi: 10.1161/JAHA.115.002408 (PMC4845138; doi:10.1161/jaha.115.002408), 2015-10-27

## **SUPPLEMENTAL MATERIAL**

**Table S1. Assessment of risk of bias across studies**

**Figure S1. Sensitivity analysis of 10 studies evaluating blood TC concentrations**

**Figure S2. Sensitivity analysis of 7 studies evaluating blood LDL-C concentrations**

**Figure S3. Sensitivity analysis of 9 studies evaluating blood HDL-C concentrations**

**Figure S4. Sensitivity analysis of 11 studies evaluating blood TG concentrations**

**Figure S5. Sensitivity analysis of 8 studies evaluating blood non-HDL-C concentrations**

**Table S1. Assessment of risk of bias across studies**

|                          | <b>Random<br/>sequence<br/>generation<br/>(selection bias)</b> | <b>Allocation<br/>concealment<br/>(selection bias)</b> | <b>Blinding of<br/>participants and<br/>personnel<br/>(performance bias)</b> | <b>Blinding of<br/>outcome<br/>assessment<br/>(detection bias)</b> | <b>Incomplete<br/>outcome data<br/>(attrition bias)</b> | <b>Selective<br/>reporting<br/>(reporting bias)</b> | <b>Other bias</b> |
|--------------------------|----------------------------------------------------------------|--------------------------------------------------------|------------------------------------------------------------------------------|--------------------------------------------------------------------|---------------------------------------------------------|-----------------------------------------------------|-------------------|
| Cooper et al,<br>1982    | Unclear risk                                                   | Unclear risk                                           | High risk                                                                    | Unclear risk                                                       | High risk                                               | High risk                                           | Unclear risk      |
| Kestin et al,<br>1989    | Unclear risk                                                   | Unclear risk                                           | High risk                                                                    | Unclear risk                                                       | High risk                                               | Low risk                                            | Unclear risk      |
| Ling et al,<br>1992      | Unclear risk                                                   | Unclear risk                                           | High risk                                                                    | Unclear risk                                                       | High risk                                               | Low risk                                            | Low risk          |
| Nicholson et al,<br>1999 | Unclear risk                                                   | Unclear risk                                           | High risk                                                                    | Unclear risk                                                       | High risk                                               | High risk                                           | Low risk          |
| Barnard et al,<br>2000   | Low risk                                                       | Unclear risk                                           | High risk                                                                    | Unclear risk                                                       | High risk                                               | Low risk                                            | Unclear risk      |
| Agren et al,<br>2001     | Unclear risk                                                   | Unclear risk                                           | High risk                                                                    | Unclear risk                                                       | High risk                                               | Low risk                                            | Low risk          |
| Burke et al,<br>2007     | Low risk                                                       | Unclear risk                                           | High risk                                                                    | Unclear risk                                                       | Low risk                                                | High risk                                           | Low risk          |
| Elkan et al,<br>2008     | Low risk                                                       | Unclear risk                                           | High risk                                                                    | Unclear risk                                                       | High risk                                               | Low risk                                            | Low risk          |
| Barnard et al,<br>2009   | Low risk                                                       | Unclear risk                                           | High risk                                                                    | Unclear risk                                                       | Low risk                                                | Low risk                                            | Low risk          |
| Kahleova et al,<br>2011  | Unclear risk                                                   | Unclear risk                                           | High risk                                                                    | Unclear risk                                                       | Low risk                                                | Low risk                                            | Low risk          |
| Mishra et al,<br>2013    | Low risk                                                       | Unclear risk                                           | High risk                                                                    | Unclear risk                                                       | Low risk                                                | Low risk                                            | Low risk          |

**Figure S1. Sensitivity analysis of 10 studies evaluating blood TC concentrations**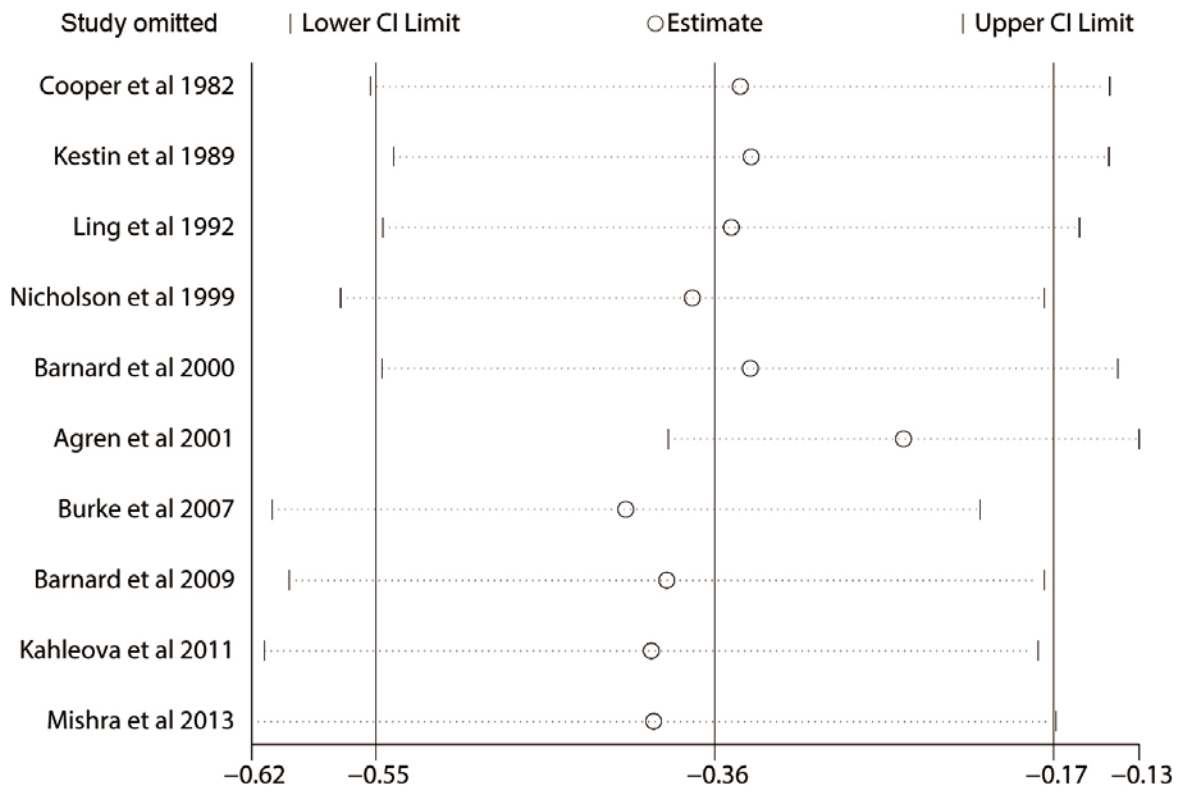

**Figure S2. Sensitivity analysis of 7 studies evaluating blood LDL-C concentrations**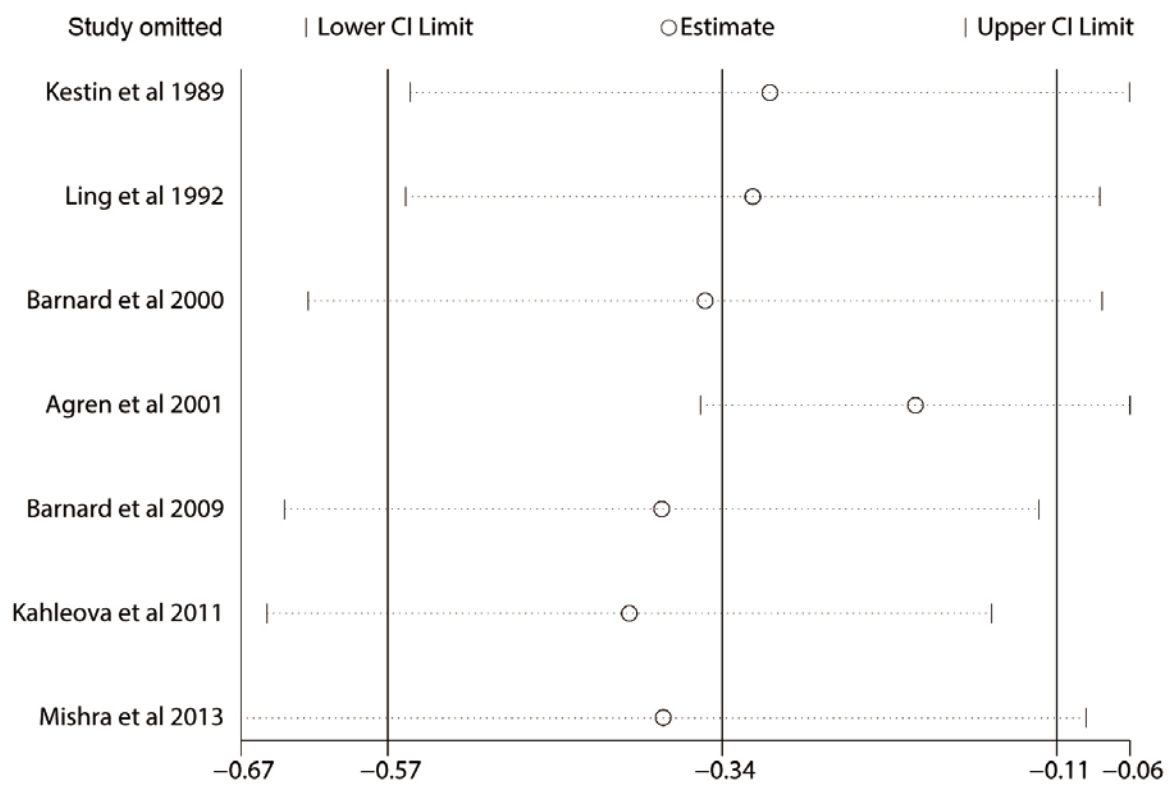

**Figure S3. Sensitivity analysis of 9 studies evaluating blood HDL-C concentrations**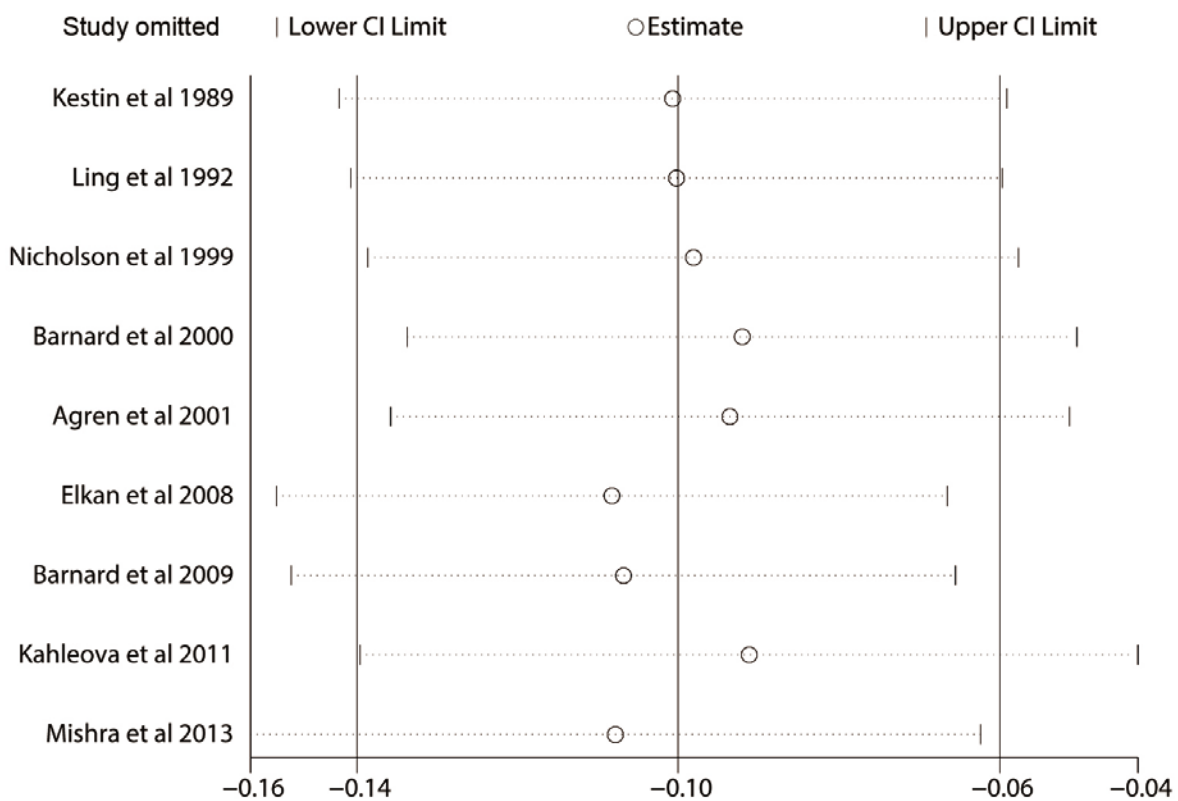

**Figure S4. Sensitivity analysis of 11 studies evaluating blood TG concentrations**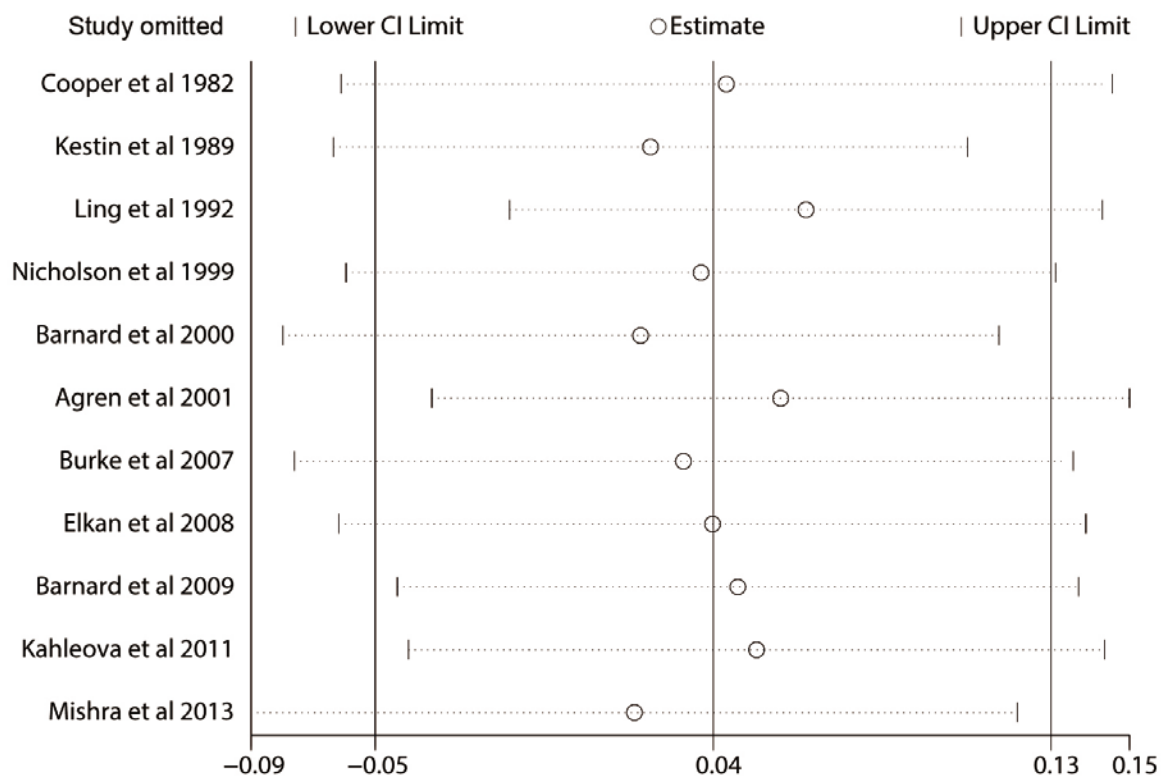

**Figure S5. Sensitivity analysis of 8 studies evaluating blood non-HDL-C concentrations**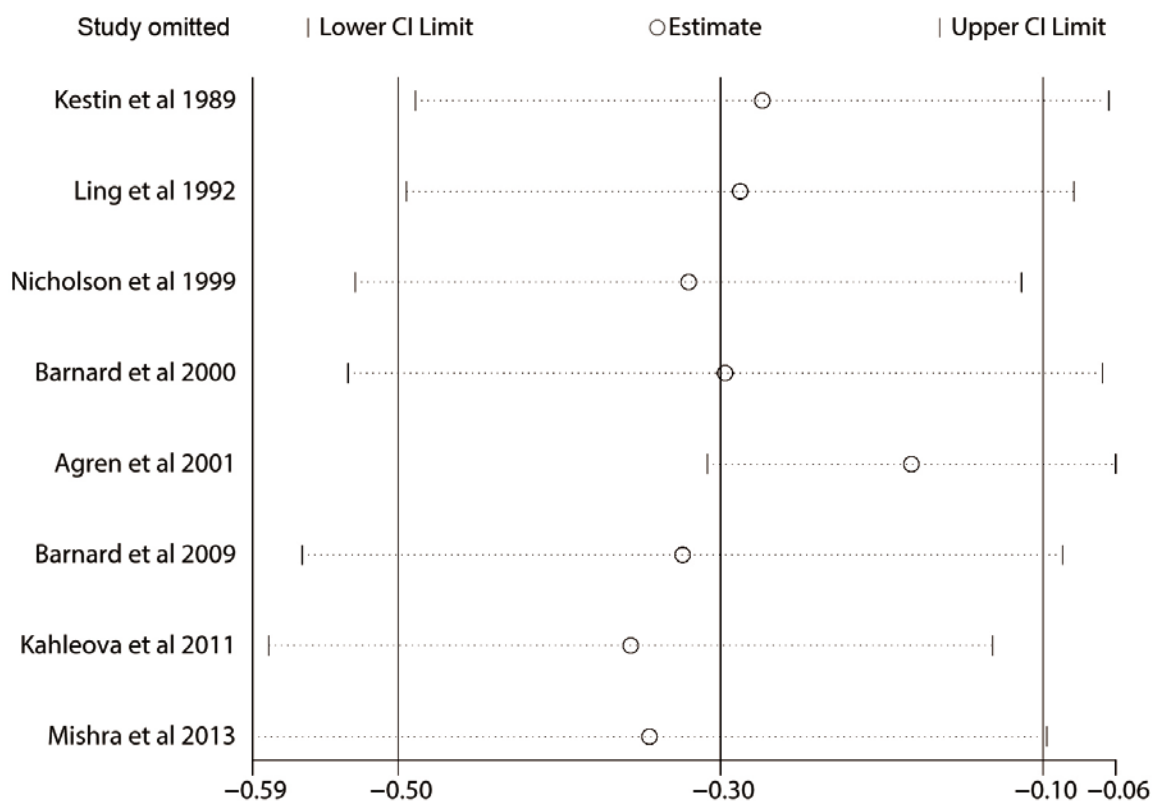

Supplement: JAH3-4-e002408-s001.pdf [file JAH3-4-e002408-s001.pdf]
